# Supplementary material
Source: PubMed Central journal article supplement (PMC3516805)
Supplement: NIHMS27807-supplement-1.pdf [file NIHMS27807-supplement-1.pdf]

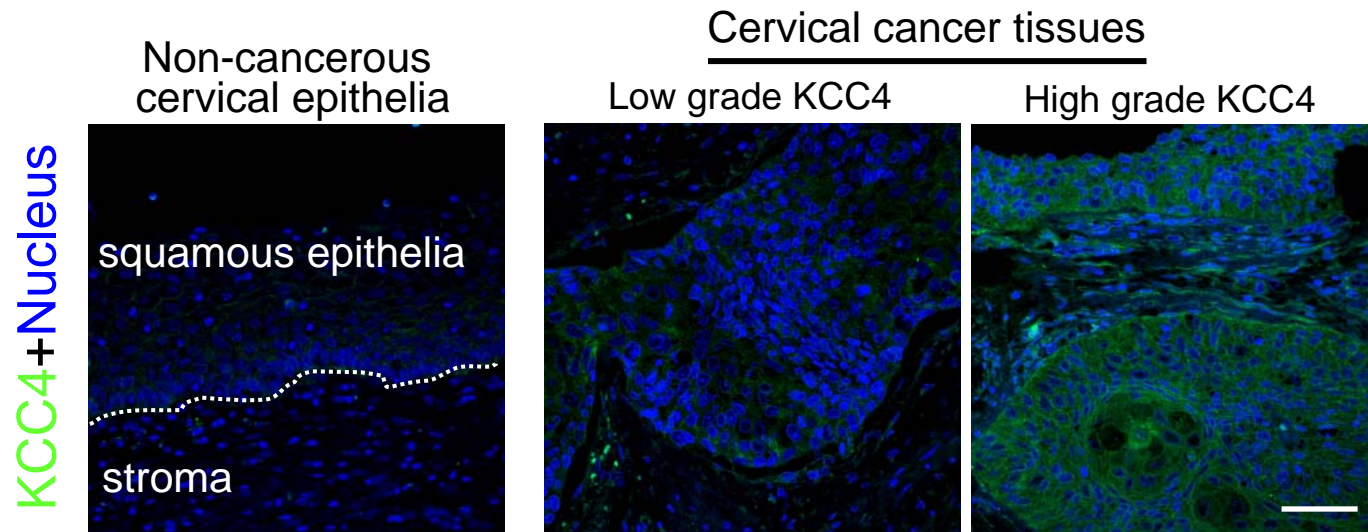

**Supplementary Figure 1. Expression patterns of KCC4 in cervical carcinoma.** KCC4 protein was scanty in non-cancerous cervical squamous epithelial tissues. In contrast, primary cancerous tissues of cervix clearly expressed KCC4 protein at different levels. The patients (n=80) were grouped by KCC4 grades and the survival data analyzed accordingly. Low grade KCC4 indicates the distribution of KCC4 staining is less than 50% of tumor area. High grade KCC4 indicates the distribution of KCC4 staining is more than 50% of tumor area. Scale bar, 10  $\mu$ m.

A

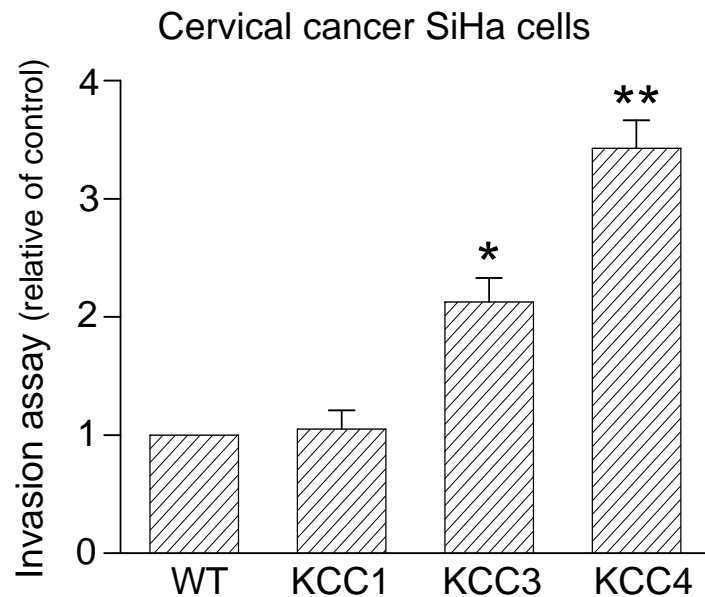

B

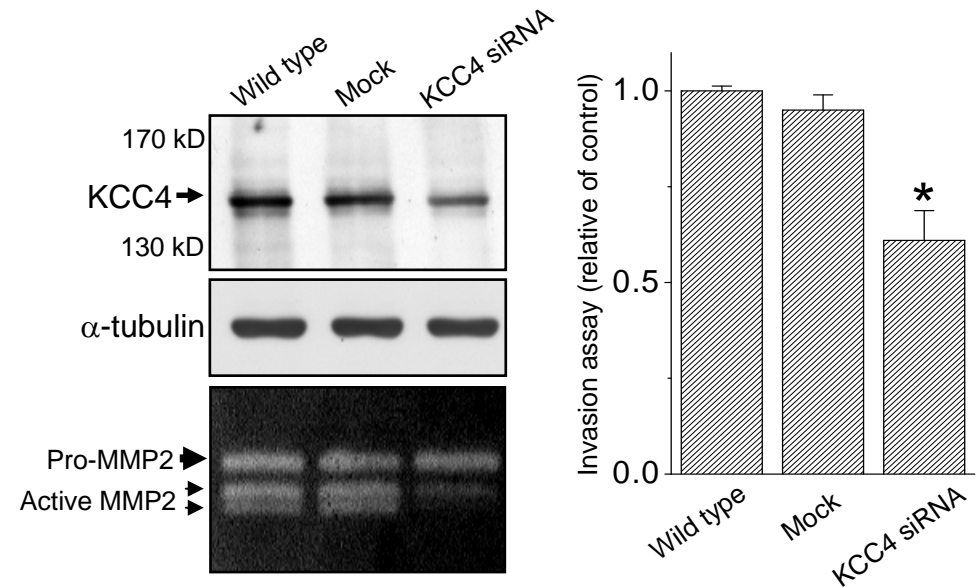

**Supplementary Figure 2. KCC4 is associated with cancer cell invasiveness.** (A) KCC4 overexpression enhances cervical cancer cell invasiveness. The invasion assays were performed among wild-type, KCC1-, KCC3-, and KCC4-overexpressed human cervical cancer SiHa cell lines. Each column represents mean  $\pm$  S.E.M. from at least 3 different experiments. The invasive ability of wild-type cells was used as the control. \* $P < 0.01$ ; \*\* $P < 0.001$ . (B) KCC4 knockdown by siRNA reduced the invasive migration of ovarian cancer OVCAR-3 cells in parallel by decreased activity of MMP-2. Each column represents mean  $\pm$  S.E.M. from at least 3 different experiments. The invasive ability of wild-type cells was used as the control. \* $P < 0.01$ .

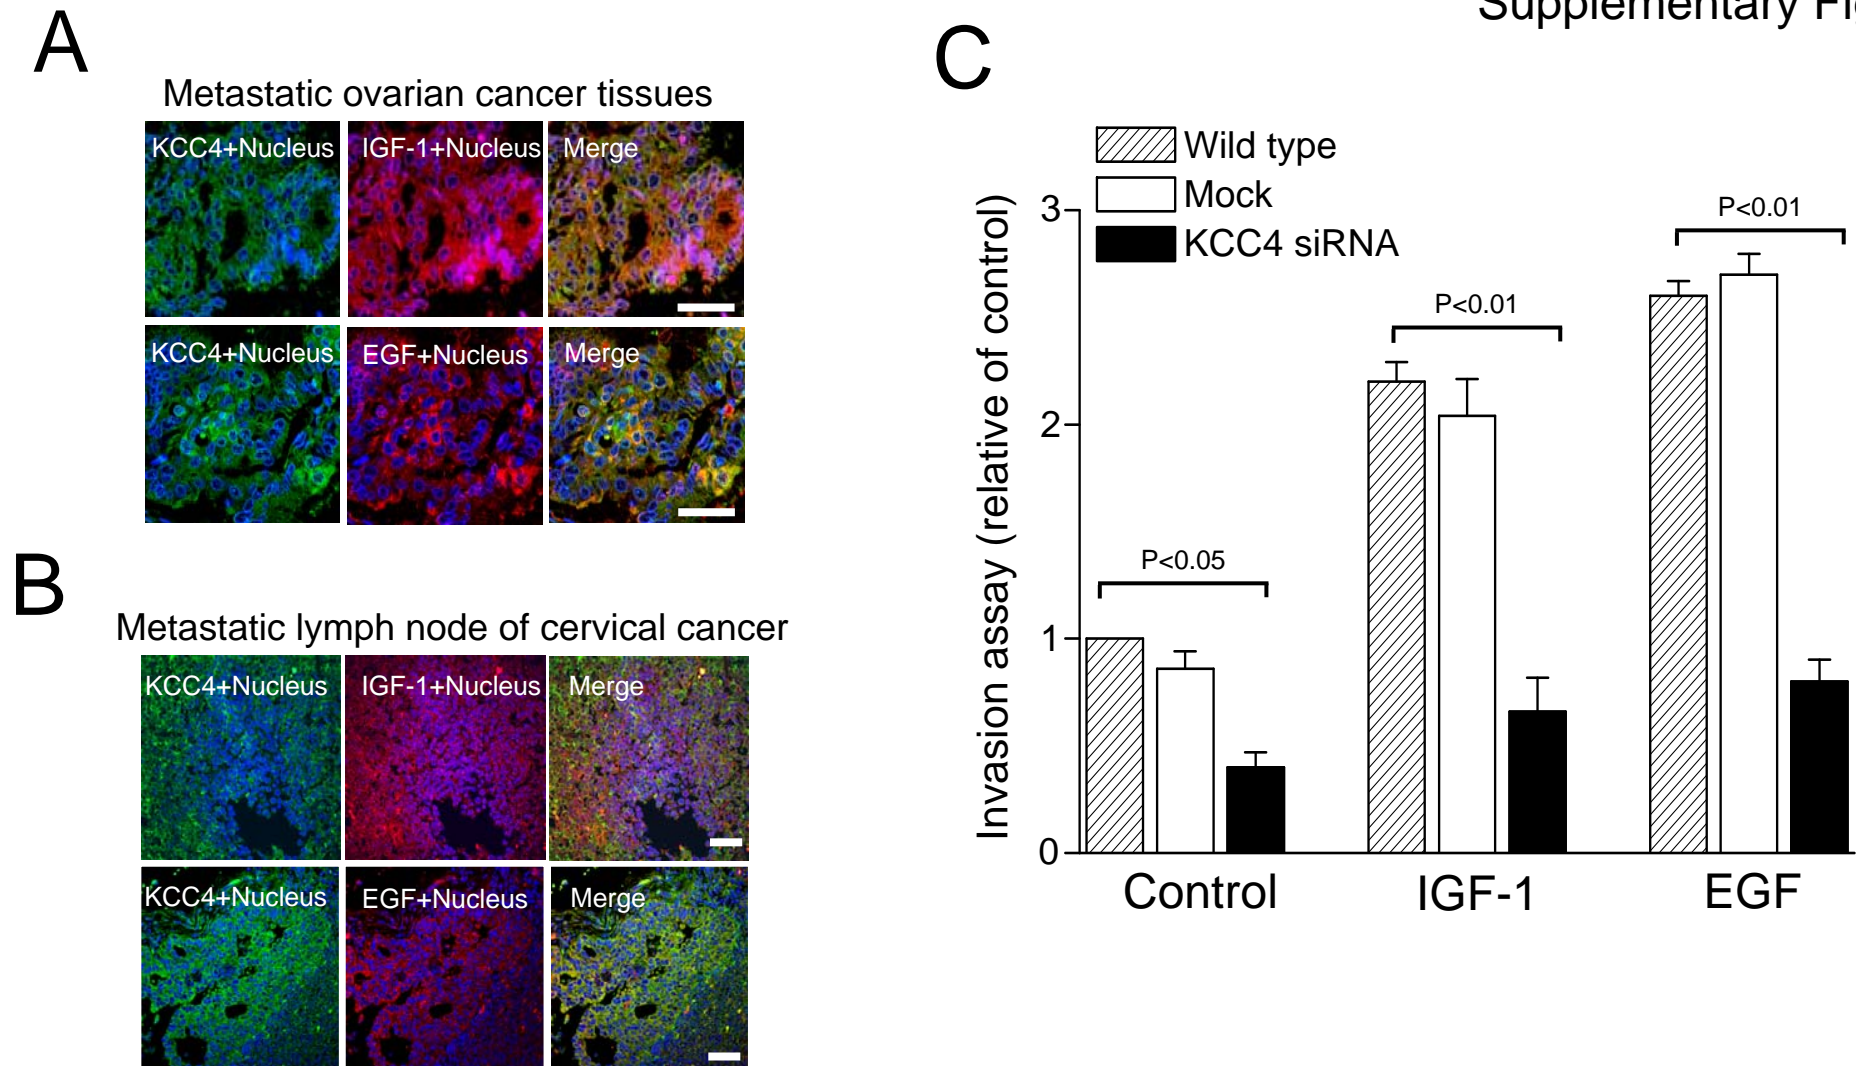

**Supplementary Figure 3. KCC4 is important for IGF-1 or EGF-stimulated cancer cell invasiveness.** (A) Expression patterns of KCC4, IGF-1 and EGF in surgical specimens of metastatic ovarian cancer. KCC4 (green), IGF-1 or EGF (red), and nucleus (blue). Scale bar, 50  $\mu$ m. Representative pictures of 15 different cases. (B) Expression patterns of KCC4, IGF-1 and EGF in the metastatic lymph node of cervical cancer. The triple-immunofluorescent stain technique was used to identify KCC4 (green), IGF-1 or EGF (red), and nucleus (blue). Scale bar, 10  $\mu$ m. The representative pictures of 10 different cases. (C) Invasive migration was assayed in the Boyden chamber as an index of invasive activity of ovarian cancer OVCAR-3 cells. Each column represents mean + S.E.M. of at least 5 different experiments. EGF, 100 ng/ml; IGF-1, 100 ng/ml.

A

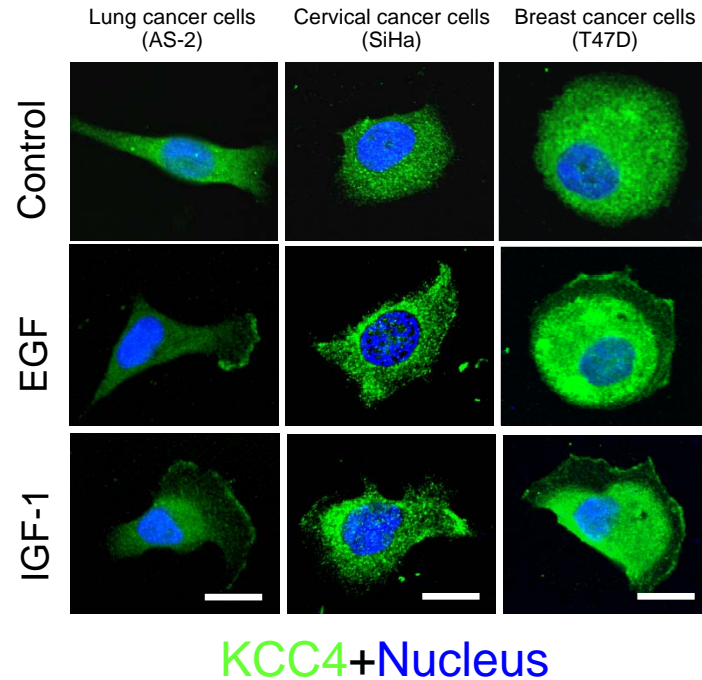

B

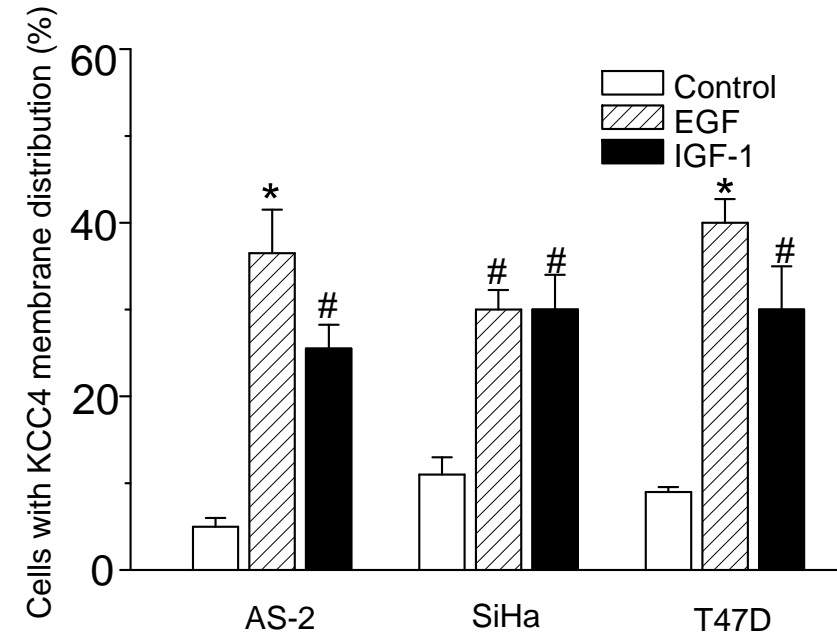

**Supplementary Figure 4. IGF-1 and EGF stimulate KCC4 membrane trafficking of cancer cells.** (A) EGF and IGF-1 stimulate the redistribution of KCC4 abundance to the plasma membrane of lamellipodia. Lung cancer AS-2 cells, cervical cancer SiHa cells and breast cancer T47D cells were incubated in the absence (control group) or presence of EGF (100 ng/ml) or IGF-1 (100 ng/ml) for 30 min. Cells were then stained with KCC4 (green), and nucleus (blue). The represent pictures from 5 different experiments. (B) The quantitative analyses of KCC4 membrane trafficking in response to growth-factor stimulation. Positive KCC4 membrane staining was defined as the distribution of KCC4 staining over more than one third of the area of the plasma membrane. Each column represents mean  $\pm$  S.E.M. of at least 250 cells. #P<0.05, \*P<0.01. Scale bar, 5  $\mu$ m.

A

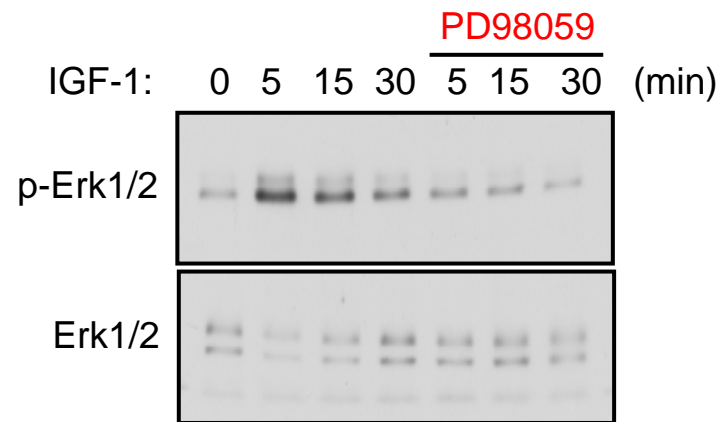

B

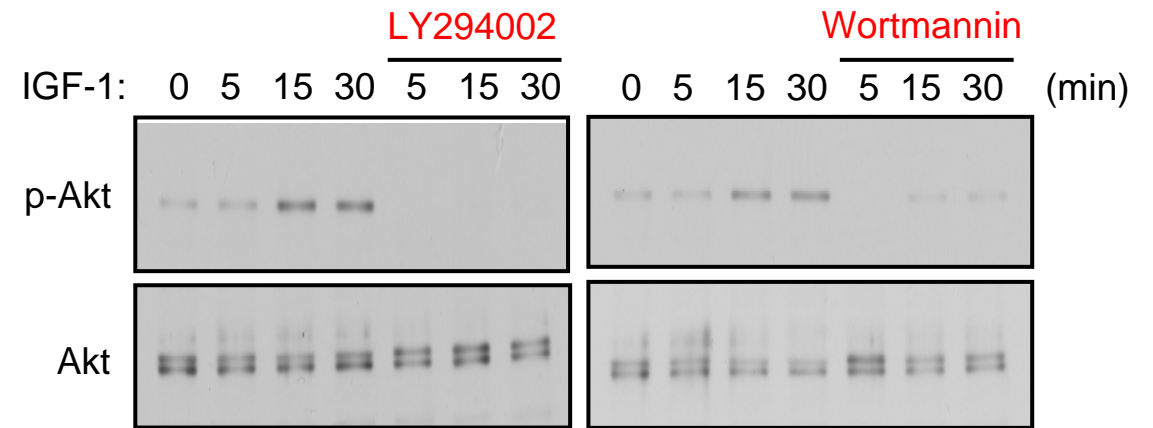

**Supplementary Figure 5. PI3K and mitogen-activated protein kinase are activated by IGF-1.** Ovarian cancer OVCAR-3 cells were pre-incubated with different inhibitors (20  $\mu$ M LY294002, 100 nM wortmannin or 50  $\mu$ M PD98059) for 30 min and then exposed to IGF-1 (100 ng/ml) stimulation for 30min. The immunoblots are the representatives of three different experiments.

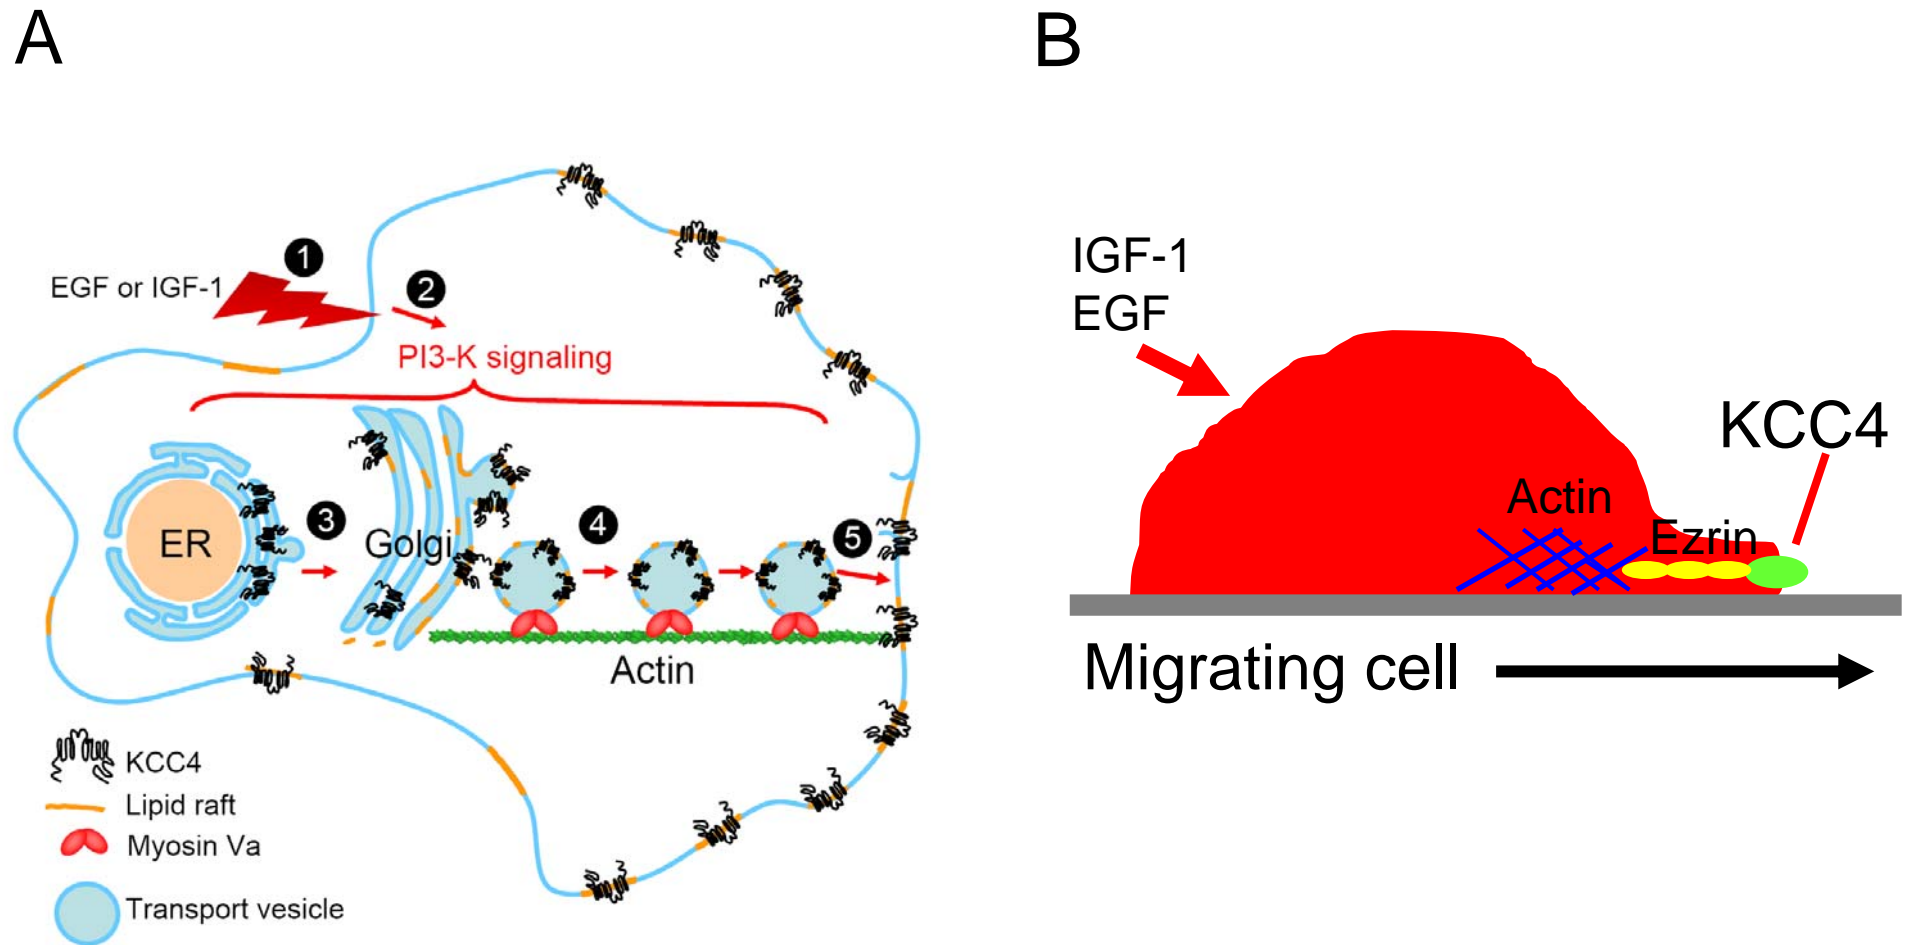

**Supplementary Figure 6. Schematic diagram of KCC4 membrane trafficking.** (A) IGF-1 and EGF stimulates the recruitment of KCC4 from the inactive storage pool in the cytosol to the active membranous target pool at the lamellipodia through a mechanism involving PI3K activation and myosin Va-actin trafficking routes. Throughout the process, KCC4 is incorporated into membrane microdomains of lipid rafts. (B) KCC4 functions as a plasma membrane scaffold protein to facilitate the modulation of cytoskeletal reorganization via the association with ezrin, that is required for cellular invasive migration.
